# Supplementary material for: VEGFR1 Activity Modulates Myeloid Cell Infiltration in Growing Lung Metastases but Is Not Required for Spontaneous Metastasis Formation
Source: PubMed Central journal article supplement (PMC2744279; doi:10.1371/journal.pone.0006525), 2009-09-18

## Supplementary Figure Legend

**Figure S1: Primary LLC1 and B16 tumor growth kinetics after VEGFR1 blockade.** LLC1 and B16 tumors were grown in BMT-*Actb-GFP*/C57BL mice treated with IgG (black solid lines) or MF1 (blue dashed lines) (A,C) or in C57BL (WT, black solid lines) or *flt-1*<sup>TK-/-</sup>/C57BL (KO, blue dashed lines) mice (B,D).

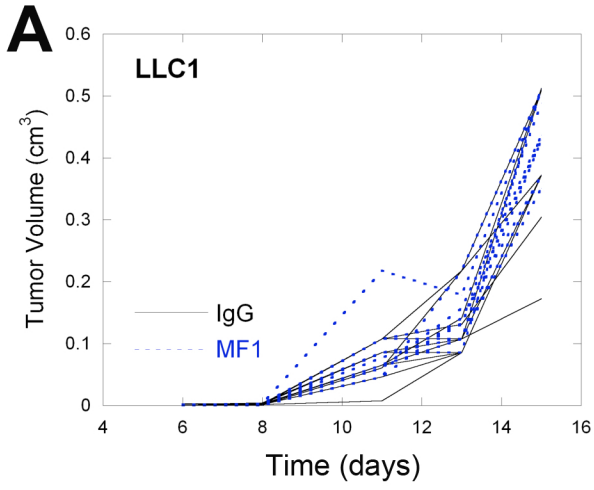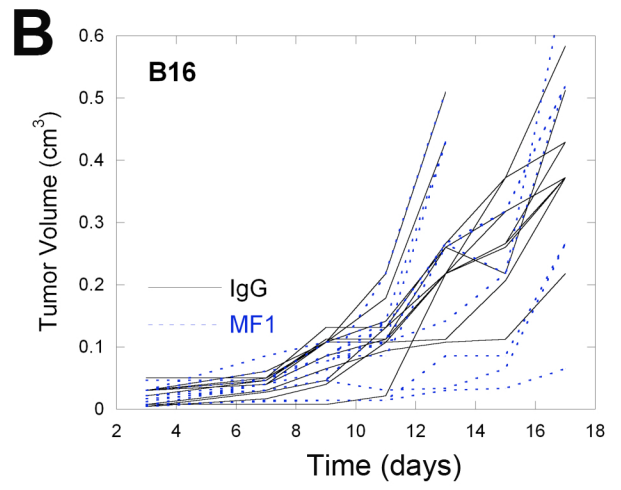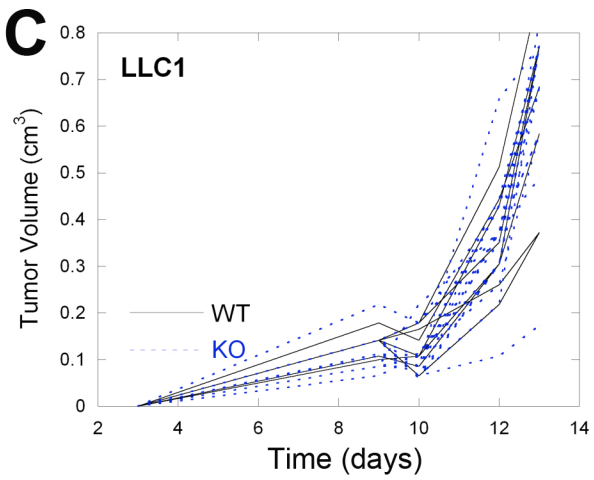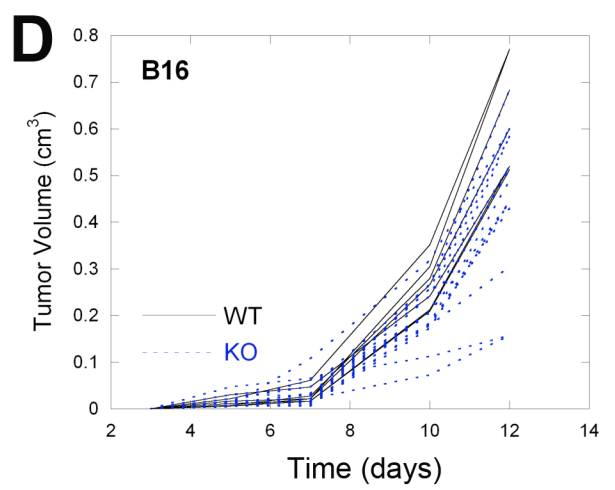

Supplement: pone.0006525.s001.pdf [file pone.0006525.s001.pdf]
